# Supplementary material for: Probiotic-derived strain-specific metabolites ameliorate metabolic dysfunction-associated steatotic liver disease through modulation of the gut-liver axis
Source: Research Square preprint supplement (doi:10.21203/rs.3.rs-7073349/v1), 2025-07-15
Supplement: Supplementary file 1 [file 47589008e5c3af80bc571f61.docx]

Supplementary Material

Probiotic-derived strain-specific metabolites ameliorate metabolic dysfunction-associated steatotic liver disease through modulation of the gut-liver axis

Sang Jun Yoon1,†, Ji Eun Choi2,†, Hee Young Kim1,†, Hyun Chae Joung3, In Kyu Park1, Jung A Eom1, Sang Hak Han4, Ki Tae Suk1,*, Do Yup Lee2,*

# * Correspondence: Ki Tae Suk, M.D., Ph.D. ktsuk@hallym.ac.kr; Do Yup Lee, Ph.D. [rome73@snu.ac.kr](mailto:rome73@snu.ac.kr)

## Supplementary Figure

**
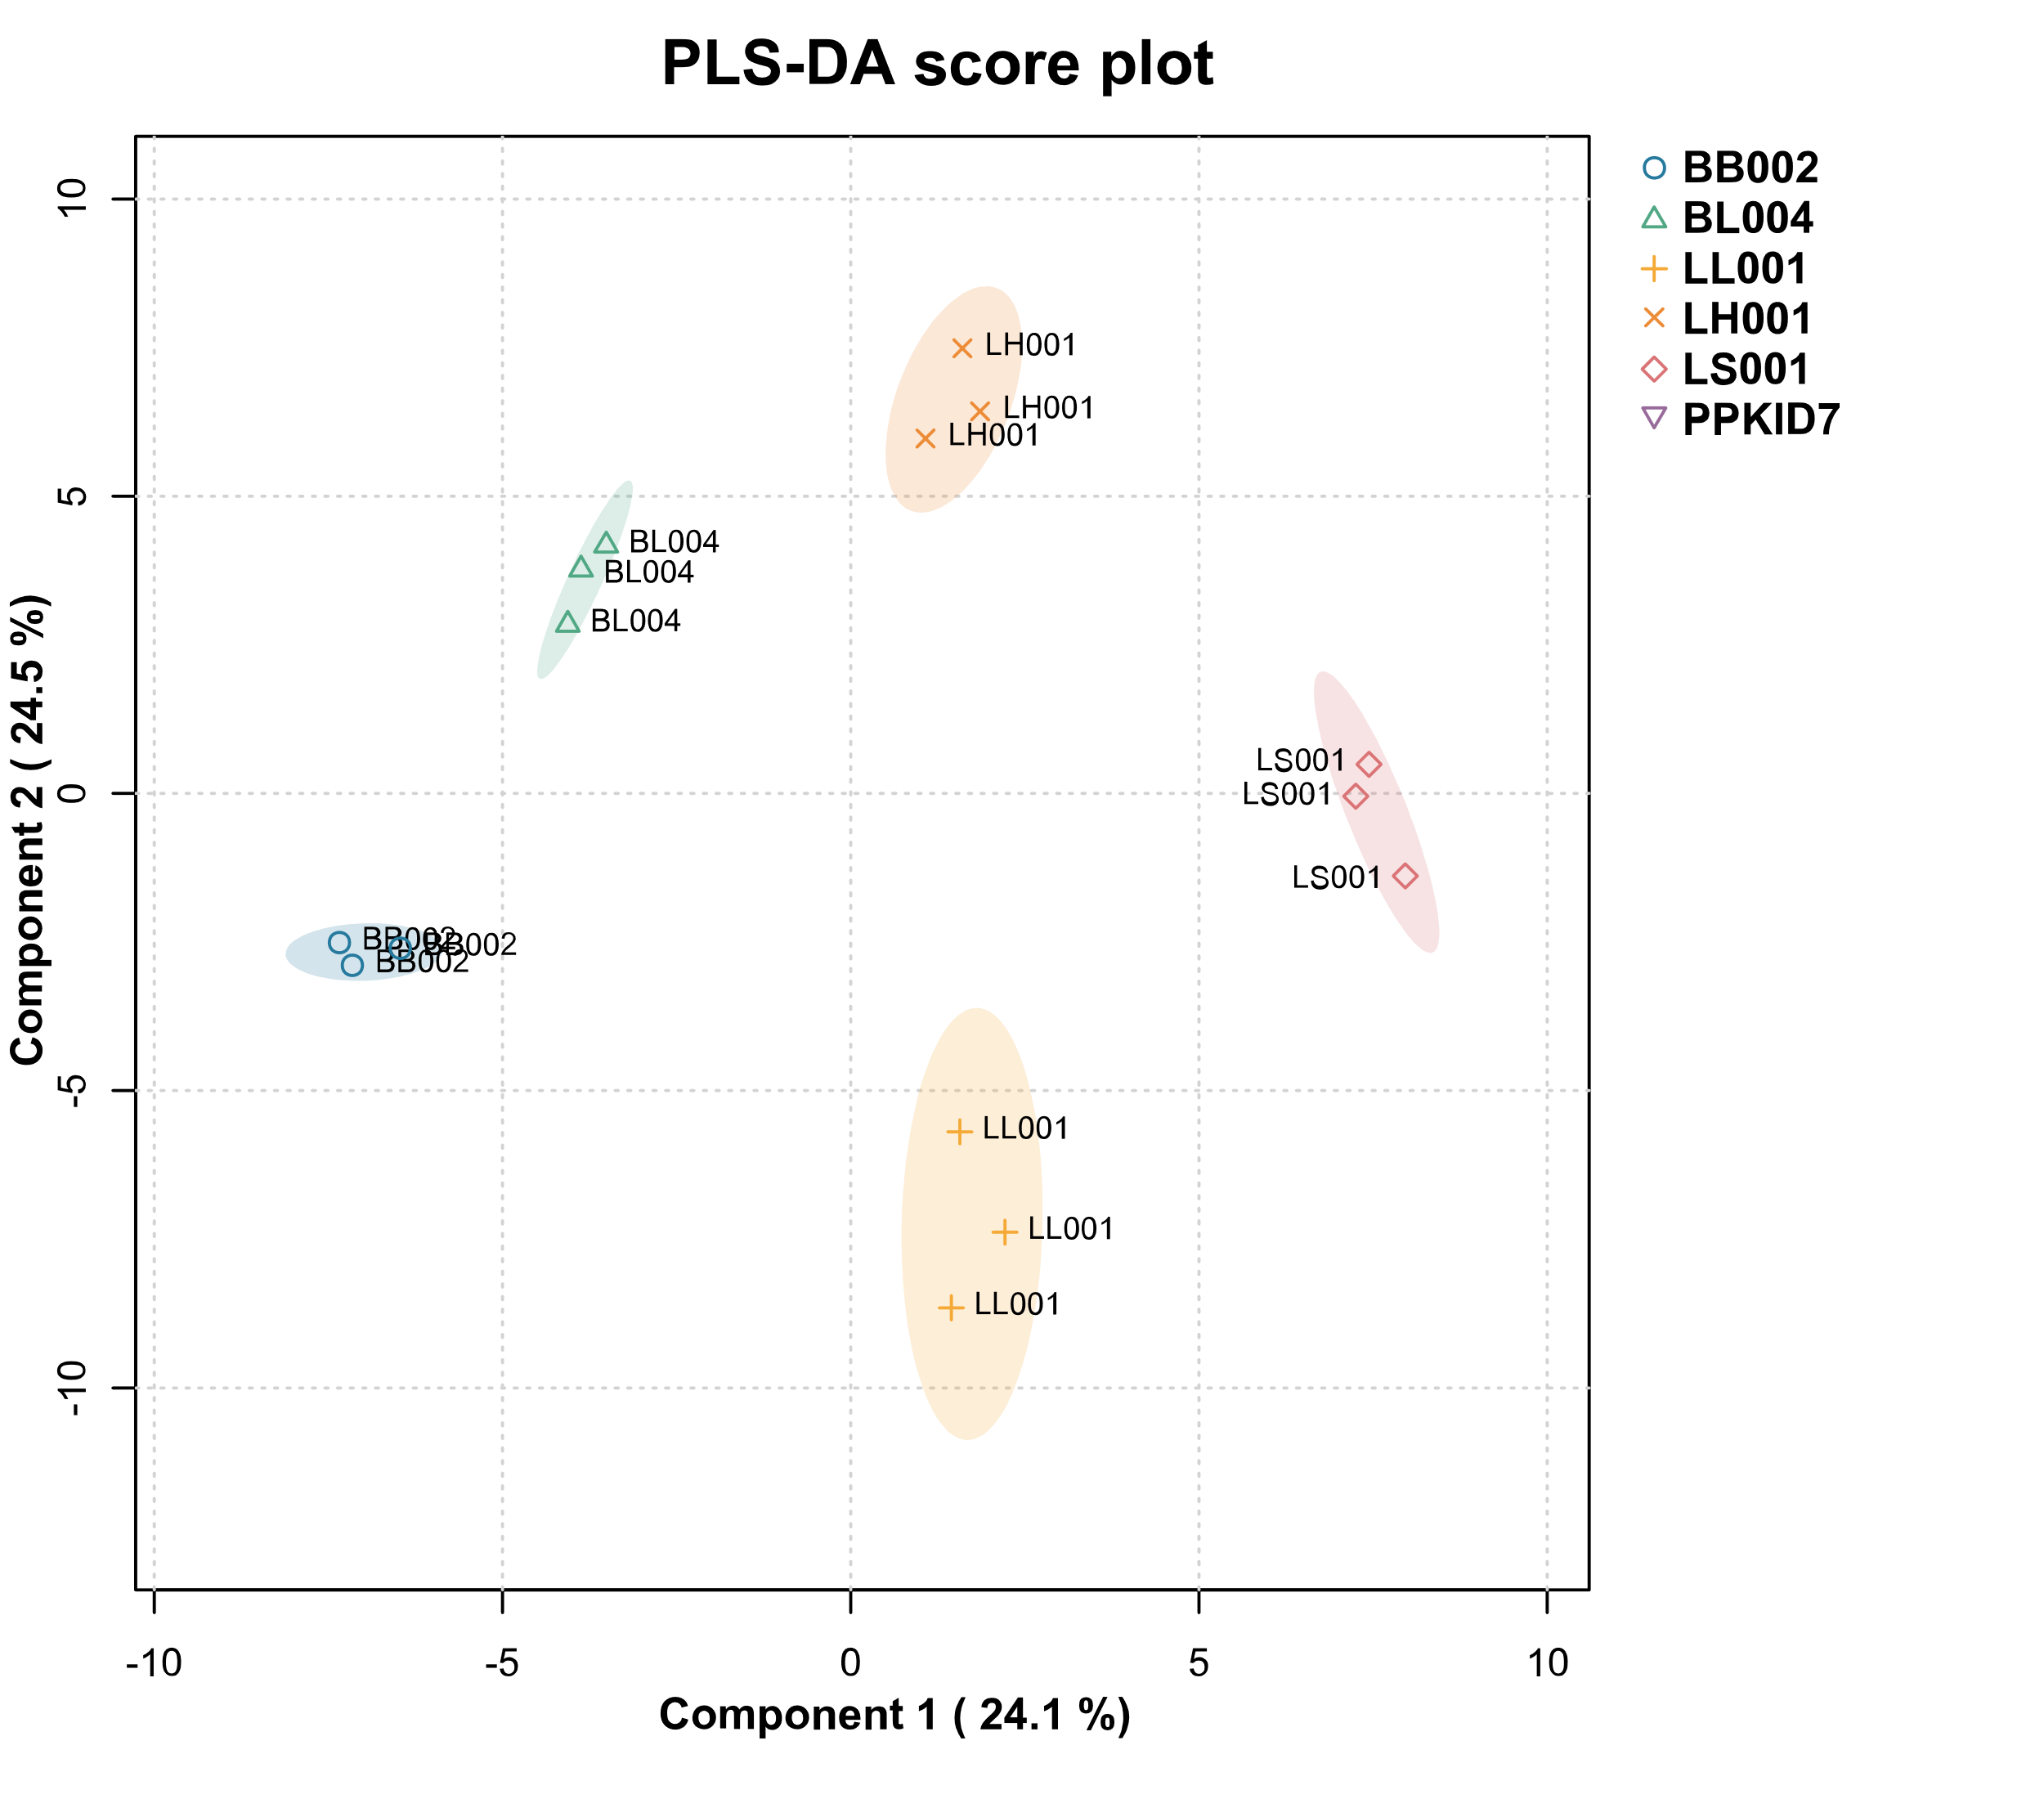
**

**Supplementary Figure 1.** PLS-DA score plot excluding PPKID7. The *Bifidobacterium* strains were separated from *Lactobacillus* strains along principal component 1, which explained 24.1% of the variance.


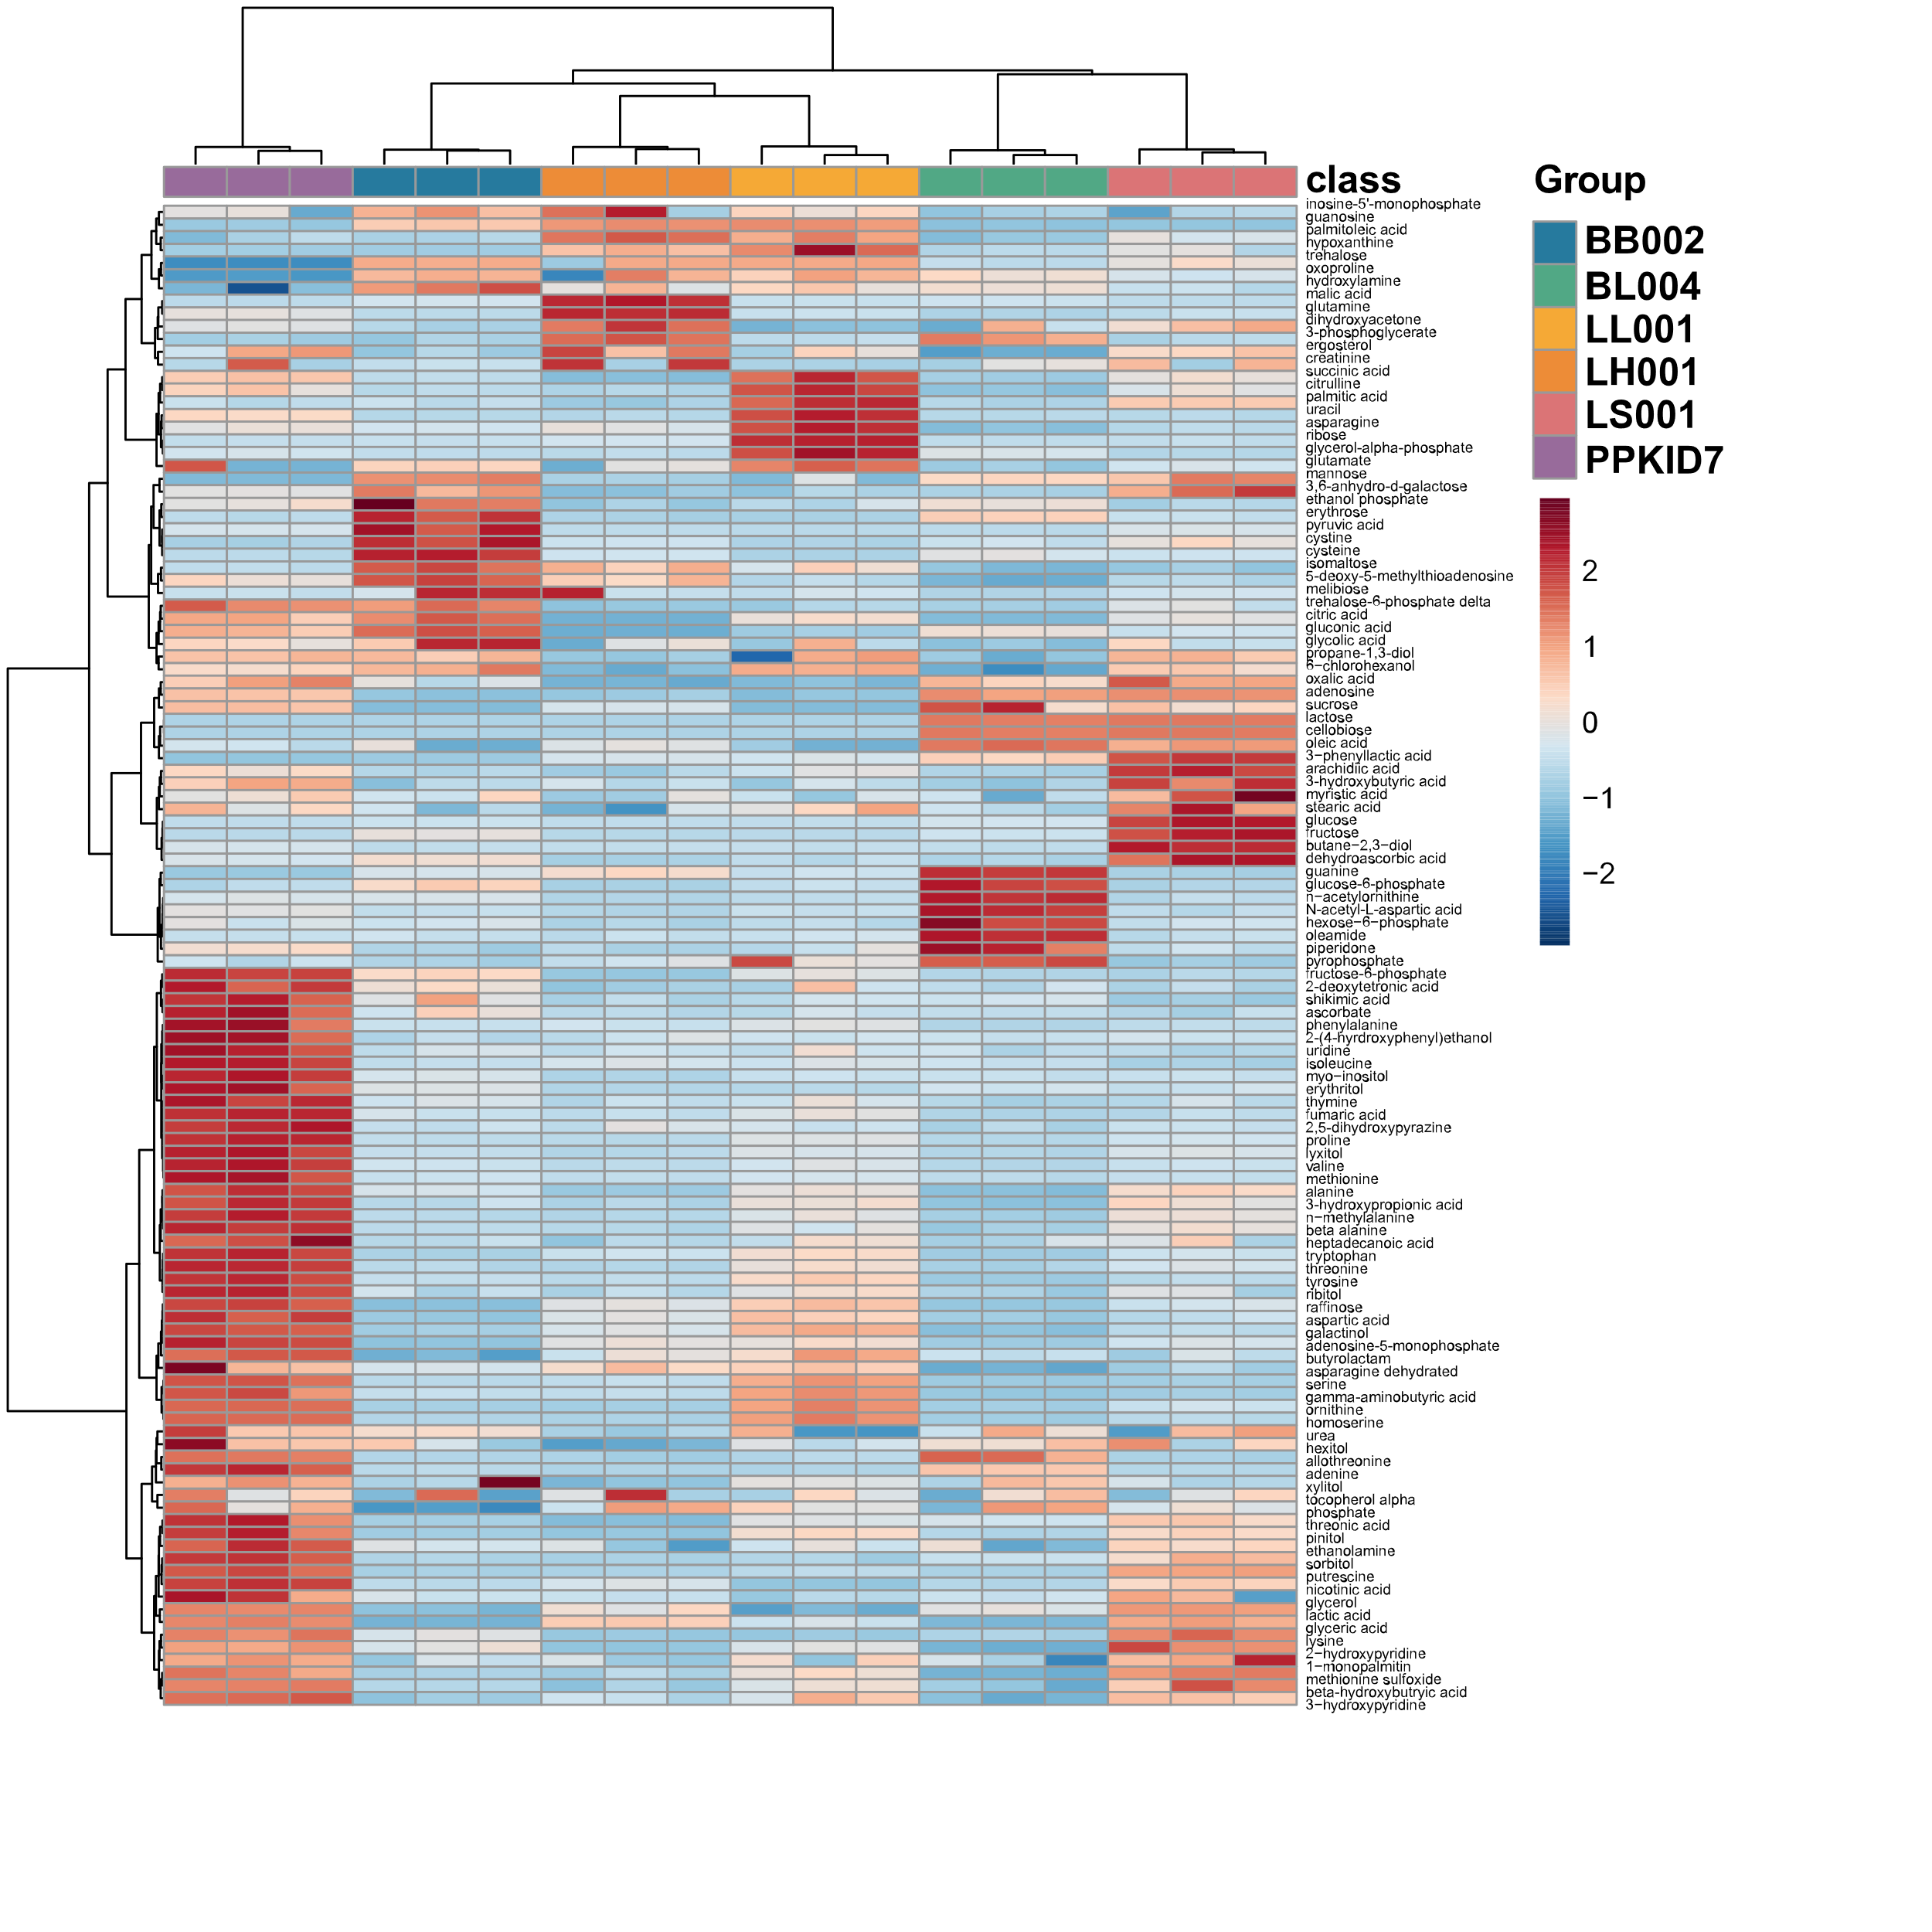
 **Supplementary Figure 2.** Heatmap and dendrogram show hierarchical cluster analysis of probiotic metabolites. Highly abundant metabolite clusters were observed in PPKID7.
